# Supplementary material for: A bubble-based microfluidic gas sensor for gas chromatographs
Source: Royal Society of Chemistry journal article supplement (doi:10.1039/c4lc00892h), 2014-10-01
Supplement: c4lc00892h1.pdf [file c4lc00892h1.pdf]

## **Electronic Supplementary Information**

### **A Bubble-based Microfluidic Gas Sensor for Gas Chromatographs**

Ashrafuzzaman Bulbul and Hanseup Kim

Electrical and Computer Engineering, University of Utah

#### **Abstract:**

This supplementary information includes some additional information to support the original data presented in the original manuscript.

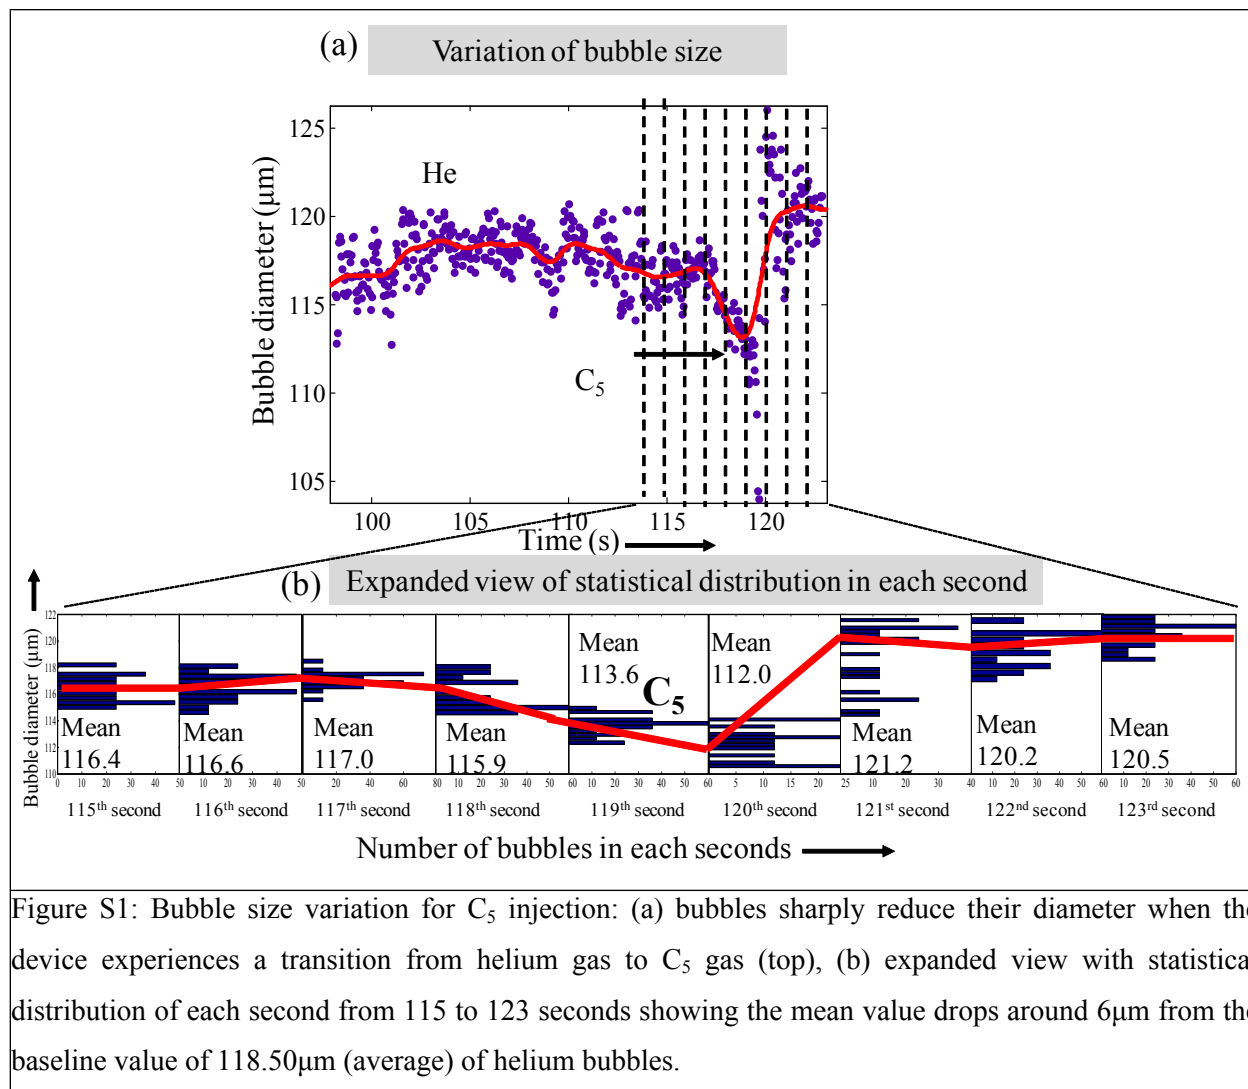

## Stability over time

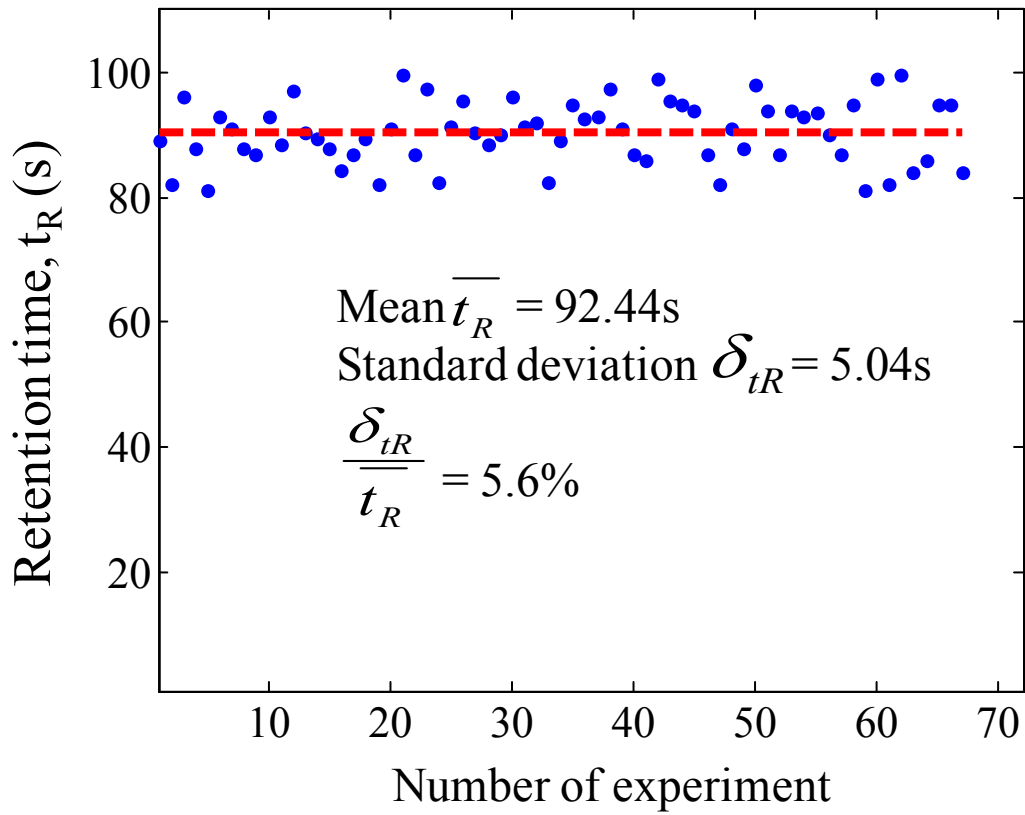

Figure S2: Variation of retention time over 67 tests for same amount of injection volume (0.001 $\mu\text{L}$ ) showing only 5.60% variations around the mean retention time of 92.44s.
